# Supplementary material
Source: publisher site journal article supplement (https://www.dovepress.com/article/398304)
Supplement: Supplementary file 1 [file get_supplementary_file.php]

Supplementary Materials

**Supplementary Table 1**  Primer sequences and product sizes of the carbapenemase genes.

| Carbapenemase genes | Primer sequences (5'-3') | Product sizes (bp) |
| --- | --- | --- |
| KPC | F: CGTCTAGTTCTGCTGTCTTG  R: CTTGTCATCCTTGTTAGGCG | 798 |
| NDM | F: GGTTTGGCGATCTGGTTTTC  R: CGGAATGGCTCATCACGATC | 621 |
| OXA-48 | F: GCGTGGTTAAGGATGAACAC  R: CATCAAGTTCAACCCAACCG | 438 |
| IMP | F: GGAATAGAGTGGCTTAAYTCTC  R: GGTTTAAYAAAACAACCACC | 232 |
| VIM | F: GATGGTGTTTGGTCGCATA  R: CGAATGCGCAGCACCAG | 390 |

Note:F, Forward primer; R, Reverse primer; KPC, Klebsiella pneumoniae carbapenemase; NDM, New Delhi metallo-β-lactamase; OXA-48, Oxacillin hydrolyzing enzymes-48; IMP, imipenemase metallo-β-lactamase; VIM, Verona integron-mediated metallo-β-lactamase; bp, base pairs.

**Supplementary Table 2** Primer sequences and product sizes of the virulence genes.

| Virulence genes | Primer sequences (5'-3') | Product sizes (bp) |
| --- | --- | --- |
| *magA* | F: GGACCGTTAATTTGCTTTGT  R: TTCGTTCACTTTCGGACTGG | 724 |
| *rmpA* | F: GTATTGGTTGACAGCAGGATTT  R: CTTTGGTAGCATGATAGCGTTT | 356 |
| *wabG* | F: GTGCAGAGCCATGAACGTATTCCC  R: CAGAGCGTCGCAGACGTAACCAT | 717 |
| *uge* | F: GGAAGGCTGCCGTCATACCA  R: GGATTACATCCTGCACCCGAAC | 374 |
| *fimH* | F: AGGATCGTTAATCGCGGTGCTG  R: TGTGGTCCGGGCATAGGTGG | 415 |
| *kfu* | F: CCGCCTCGATCCCACCCTTGAA  R: GCCAGCGGCACAGGACCAGTAA | 449 |

Note: F, Forward primer; R, Reverse primer; bp, base pairs.

**Supplementary Table 3** Primer sequences and product sizes of the housekeeping genes.

| Housekeeping genes | Primer sequences (5'-3') | Product sizes (bp) |
| --- | --- | --- |
| *gapA* | F: TGAAATATGACTCCACTCACGG  R: CTTCAGAAGCGGCTTTGATGGCTT | 662 |
| *infB* | F: ACTAAGGTTGCCTCCGGCGAAGC  R: CGCTTTCAGCTCAAGAACTTC | 462 |
| *mdh* | F: CCCAACTCGCTTCAGGTTCAG  R: CCGTTTTTCCCCAGCAGCAG | 756 |
| *pgi* | F: CTGCTGGCGCTGATCGGCAT  R: TTATAGCGGTTAATCAGGCCGT | 566 |
| *phoE* | F: ACCTACCGCAACACCGACTTCTTCGG  R: CGCTTTCAGCTCAAGAACTTC | 602 |
| *tonB* | F: CTTTATACCTCGGTACATCAGGTT  R: ATTCGCCGGCTGRGCRGAGAG | 539 |
| *rpoB* | F: GGCGAAATGGCWGAGAACCA  R: GAGTCTTCGAAGTTGTAACC | 1075 |

Note: F, Forward primer; R, Reverse primer; bp, base pairs.


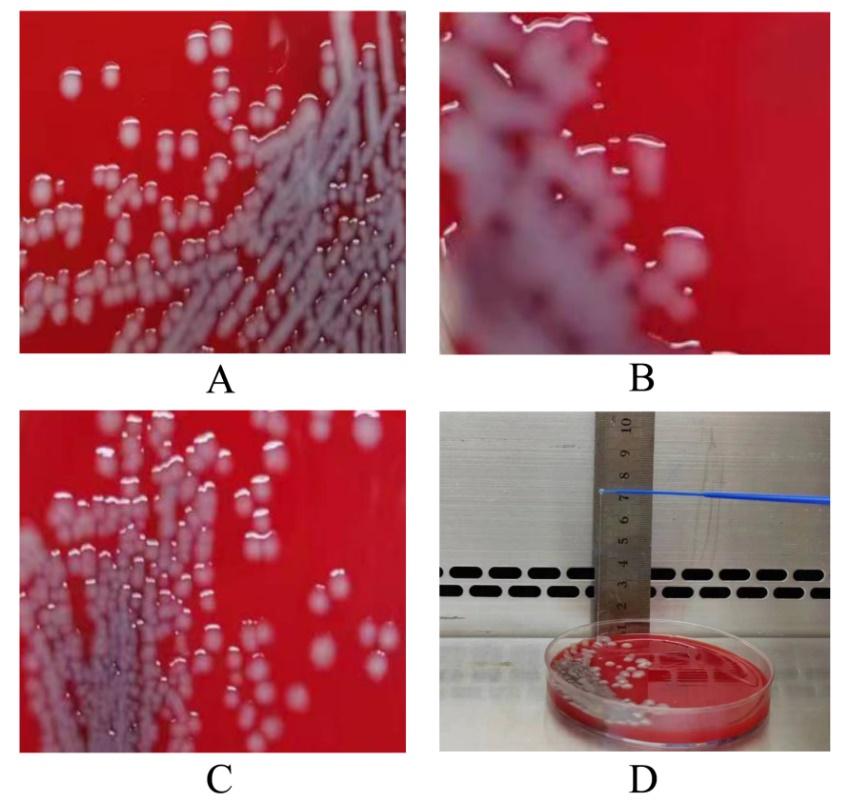


**Supplementary Figure 1** Phenotypic characteristics of the recovered CRKP isolates. A: white, moist, and convex colonies; B: grey, moist, convex and mucous colonies (colony fusion could be seen); C: grey, convex and smooth colonies; D: a representative positive string test.

**Supplementary Table 4** Relationship between multiple drug resistance phenotypes and carbapenemase genes.

| Phenotype | Metallo-β-lactamase b | Serine carbapenemase c | Total |
| --- | --- | --- | --- |
| MDR a | 64 (NDM 62, VIM 2) | 6 | 70 |
| XDR | 7 (NDM 6, VIM 1) | 13 | 20 |
| PDR | 0 | 4 | 4 |

Note:

a *vs.* XDR (*P* < 0.001). b Number of CRKP isolates carrying either NDM or VIM. c Number of CRKP isolates carrying KPC.

MDR, multidrug resistant phenotype; XDR, extensively drug-resistant phenotype; PDR, pandrug-resistant phenotype; NDM, New Delhi metallo-β-lactamase; KPC, Klebsiella pneumoniae carbapenemase; VIM, Verona integron-mediated metallo-β-lactamase.
